# Supplementary material for: Development of the multi-epitope chimeric antigen rqTSA-25 from Taenia saginata for serological diagnosis of bovine cysticercosis
Source: PLOS journal article supplement (doi:10.1371/journal.pntd.0006371), 2018-04-12

Prototypical STARD diagram to report flow of participants through the study

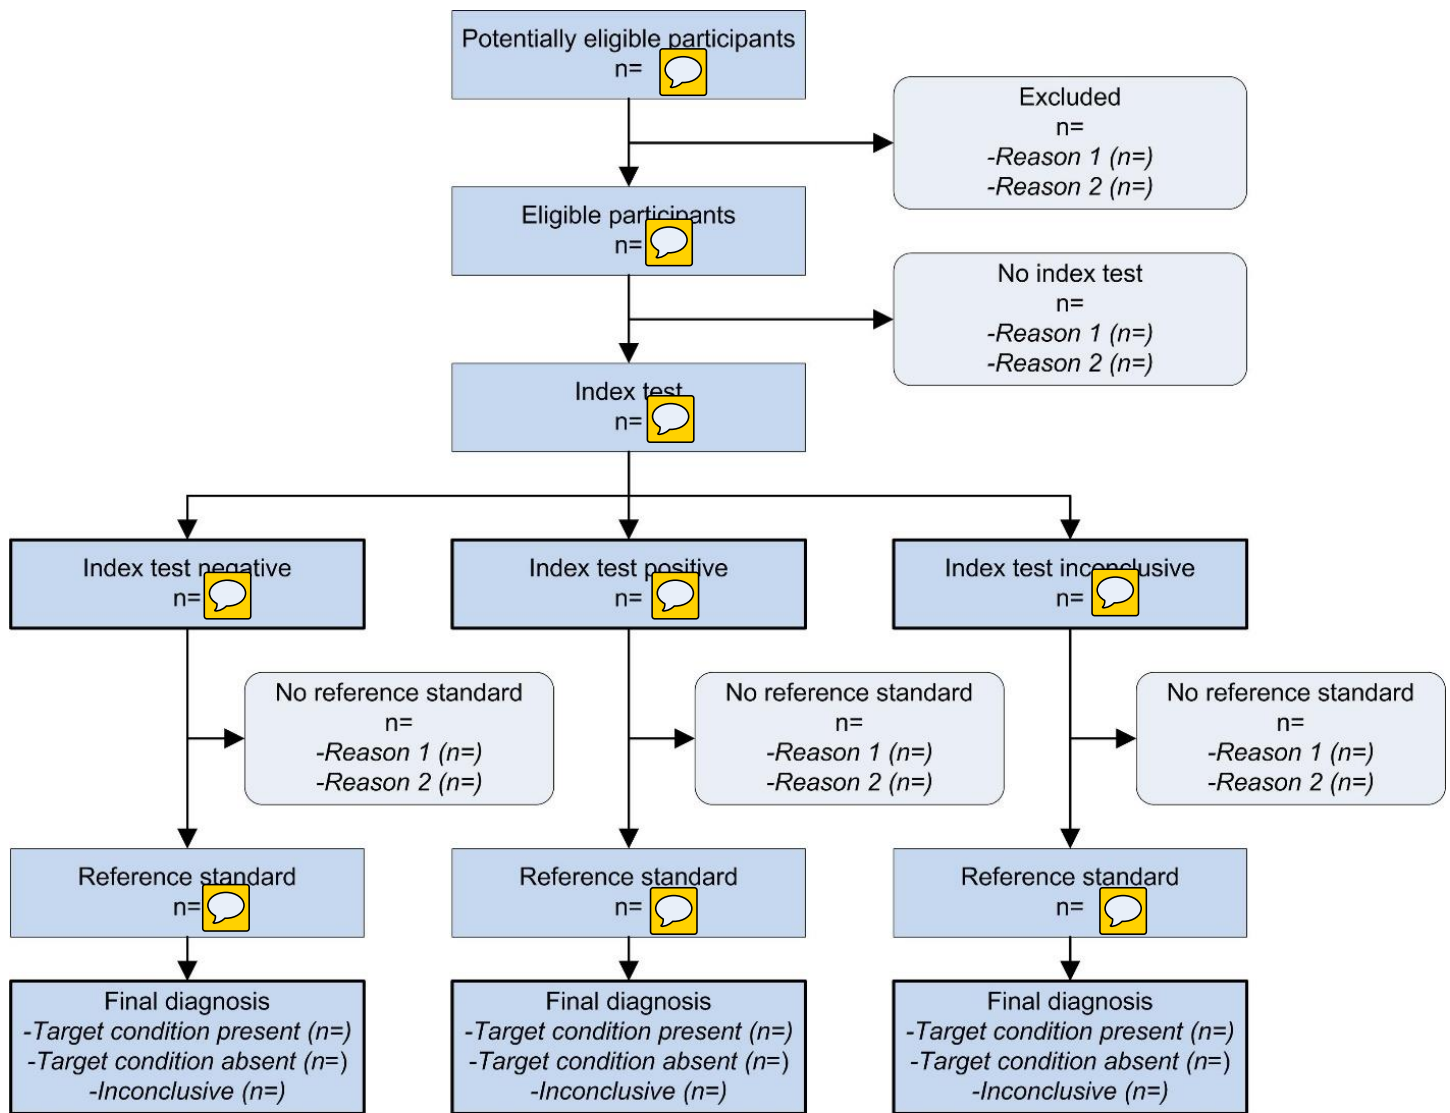

Supplement: S4 (10.1371/journal.pntd.0006371.s004) [file journal.pntd.0006371.s004]
